# Supplementary material
Source: publisher figshare collection journal article supplement (https://plos.figshare.com/articles/dataset/_/122244)
Supplement: Supplementary file 1 [file 1 › Table_S1.pdf]

**Table S1. Performance summary for four computational methods using different reference genome sets on LQG dataset**

| <b>Method</b> | <b>Variant</b> | <b>ALL</b> | <b>BAAC</b> | <b>BAS</b> | <b>BAC</b> | <b>GAMMA</b> | <b>BANR</b> |
|---------------|----------------|------------|-------------|------------|------------|--------------|-------------|
| PPM           | BPPM           | 0.64       | 0.66        | 0.65       | 0.58       | 0.53         | 0.64        |
|               | SPPM           | 0.71       | 0.72        | 0.7        | 0.68       | 0.72         | 0.68        |
| MDM           | MDM            | 0.72       | 0.72        | 0.7        | 0.69       | 0.7          | 0.65        |
| Mirrortree    | Mirrortree     | NA         | NA          | 0.62       | 0.65       | 0.63         | 0.61        |
|               | Tol-mirrortree | NA         | NA          | 0.64       | 0.66       | 0.63         | 0.6         |
|               | GD-Mirrortree  | NA         | NA          | 0.66       | 0.66       | 0.65         | 0.6         |

Notes: The performance summary of protein-protein prediction methods measured as Area Under the ROC Curve (AUC). BPPM stands for Binary Phylogenetic Profile Method; SPPM stands for Sequence Similarity (Bits scores) based Phylogenetic Profiling Method; GCM is Gene Cluster Method, MDM is gene neighborhood based Minimum Distance Method; GD is genome distance; NA stands for sets that are not analyzed for corresponding methods. ALL, BAAC, BAS, BAC, GAMMA and BANR are reference genome sets whose compositions is given in Table 1.
