# Supplementary material
Source: publisher figshare collection journal article supplement (https://plos.figshare.com/articles/dataset/_/122244)
Supplement: Supplementary file 1 [file 1 › Table_S3.pdf]

**Table S3. Performance summary for four computational methods using different reference genome sets on EcoCyc co-complex protein-protein interactions**

| Method     | Variant        | ALL  | BAAC | BAS  | BAC  | GAMMA | BANR |
|------------|----------------|------|------|------|------|-------|------|
| PPM        | BPPM           | 0.86 | 0.86 | 0.84 | 0.81 | 0.80  | 0.72 |
|            | SPPM           | 0.87 | 0.87 | 0.84 | 0.83 | 0.87  | 0.74 |
| GCM        | GCM            | 0.94 | 0.92 | 0.90 | 0.86 | 0.90  | 0.78 |
| MDM        | MDM            | 0.89 | 0.89 | 0.85 | 0.81 | 0.88  | 0.68 |
| Mirrortree | Mirrortree     | NA   | NA   | 0.66 | 0.66 | 0.65  | 0.58 |
|            | Tol-mirrortree | NA   | NA   | 0.66 | 0.68 | 0.66  | 0.57 |
|            | GD-mirrortree  | NA   | NA   | 0.72 | 0.69 | 0.68  | 0.58 |

Notes: The performance summary of protein-protein prediction methods measured as Area Under the ROC Curve (AUC). BPPM stands for Binary Phylogenetic Profile Method; SPPM stands for Sequence Similarity (Bits scores) based Phylogenetic Profiling Method; GCM is Gene Cluster Method, MDM is gene neighborhood based Minimum Distance Method; GD is genome distance; NA stands for sets that are not analyzed for corresponding methods. ALL, BAAC, BAS, BAC, GAMMA and BANR are reference genome sets whose compositions is given in Table 1.
